# Supplementary material
Source: Royal Society of Chemistry journal article supplement (doi:10.1039/d6nr01348a)
Supplement: d6nr01348a1.pdf [file d6nr01348a1.pdf]

Electronic Supplementary Information (ESI) for Chemical Communications. This journal is (c) The Royal Society of Chemistry 2026.  
Electronic Supplementary Information (ESI)

**Designing a Carbon-Encapsulated ZnS/SnS<sub>2</sub>/SnO<sub>2</sub> Heterojunction Secondary Battery Anode Displaying Large Capacity and Good Stability**

Jinyun Liu<sup>a,\*</sup>, Yongmei Hua<sup>a</sup>, Huiyi Songtian<sup>a</sup>, Shenglan Li<sup>a</sup>, Yin Peng<sup>a,\*</sup>, Zeng Pan<sup>b,\*</sup>

<sup>a</sup>. Key Laboratory of Functional Molecular Solids, Ministry of Education, College of Chemistry and Materials Science, Anhui Normal University, Wuhu, Anhui 241002, PR China

<sup>b</sup>. Shenzhen BYD Lithium Battery Co., Ltd., Shenzhen, Guangdong 518116, PR China

---

\* Corresponding Author.

Jinyun Liu (jyliu@iim.ac.cn), Yin Peng (kimipeng@mail.ahnu.edu.cn); Zeng Pan (zengpan@nankai.edu.cn).

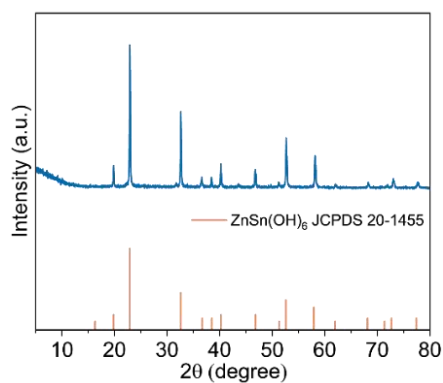

**Fig. S1** XRD pattern of the  $\text{ZnSn}(\text{OH})_6$  precursor.

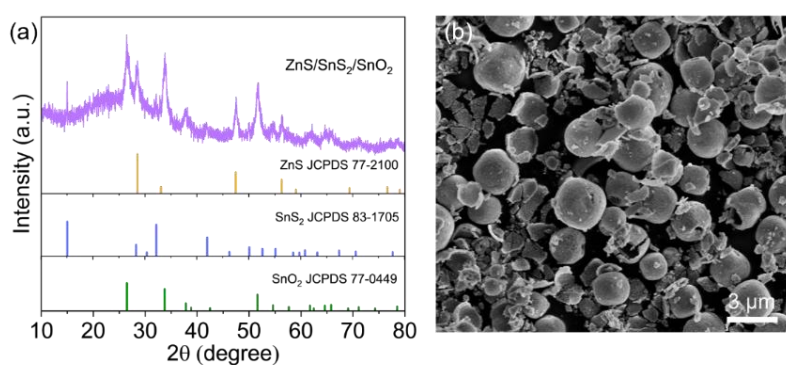

**Fig. S2** (a) XRD pattern and (b) SEM image of  $\text{ZnS}/\text{SnS}_2/\text{SnO}_2$ .

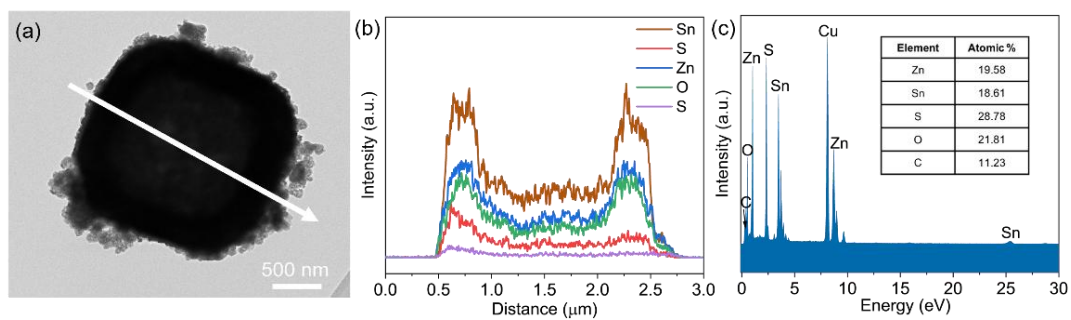

**Fig. S3** (a) SEM image, (b) line-scanning curves, and (c) EDS spectrum of  $\text{ZnS}/\text{SnS}_2/\text{SnO}_2@\text{C}$ .

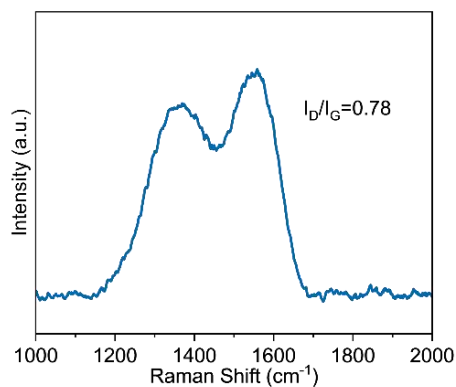

**Fig. S4** Raman spectrum of ZnS/SnS<sub>2</sub>/SnO<sub>2</sub>@C.

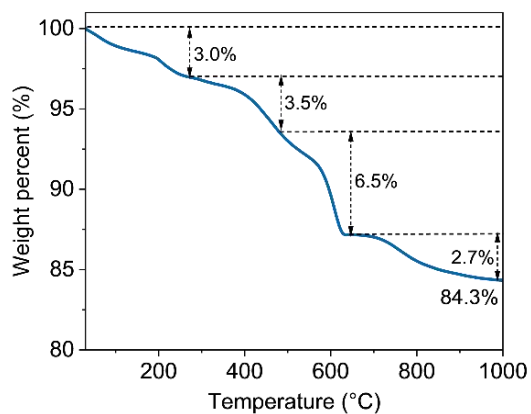

**Fig. S5** TGA curve of ZnS/SnS<sub>2</sub>/SnO<sub>2</sub>@C.

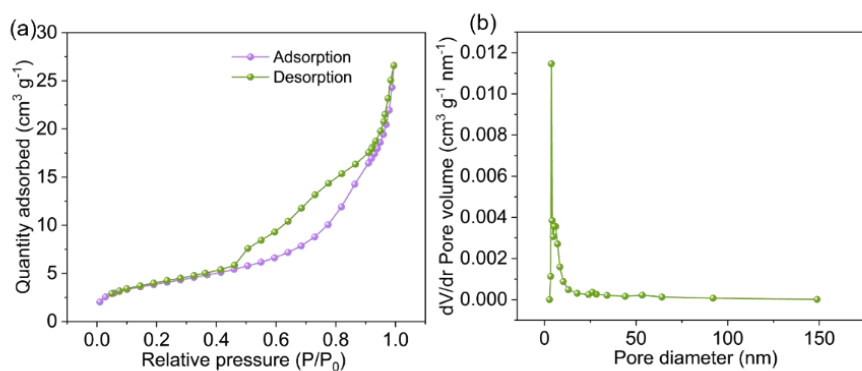

**Fig. S6** (a) N<sub>2</sub> adsorption-desorption isotherms and (b) pore-size distribution of ZnS/SnS<sub>2</sub>/SnO<sub>2</sub>@C.

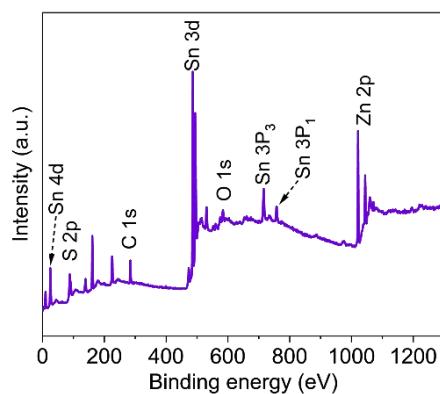

**Fig. S7** XPS survey spectrum of ZnS/SnS<sub>2</sub>/SnO<sub>2</sub>@C.

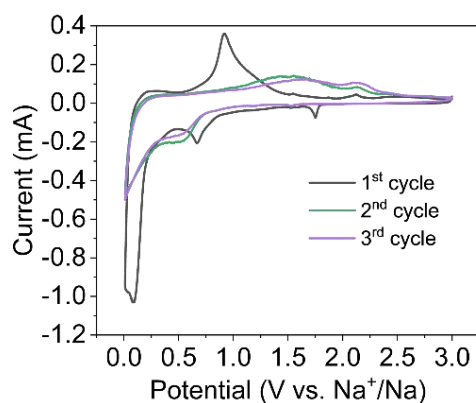

**Fig. S8** CV curves of ZnS/SnS<sub>2</sub>/SnO<sub>2</sub> during the initial three cycles at 0.1 mV s<sup>-1</sup>.

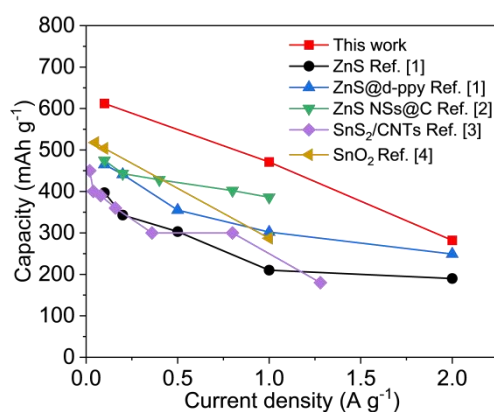

**Fig. S9** Comparison on the performance of the ZnS/SnS<sub>2</sub>/SnO<sub>2</sub>@C with some ZnS, SnS<sub>2</sub>, or SnO<sub>2</sub>-based anodes.

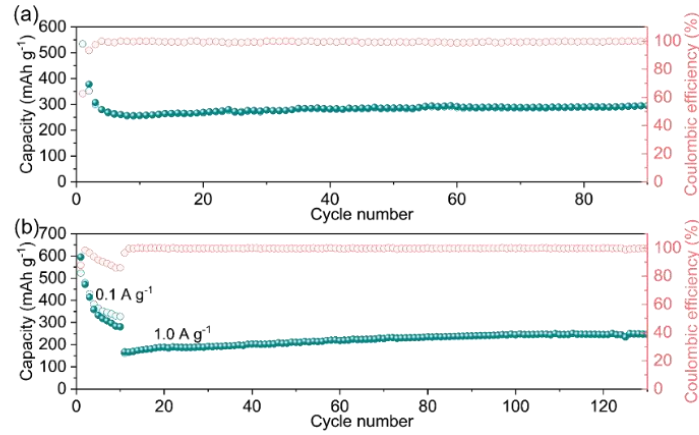

**Fig. S10** Cycling performance of ZnS/SnS<sub>2</sub>/SnO<sub>2</sub>@C under -10 °C at (a) 0.5 and (b) 1.0 A g<sup>-1</sup>. In (b), the anode was pre-activated 10 times at 0.1 A g<sup>-1</sup>.

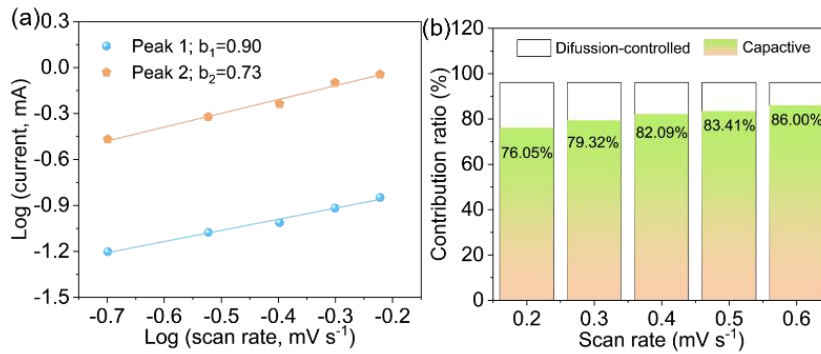

**Fig. S11** (a) The  $\log(i)$  versus  $\log(v)$  plots for oxidization and reduction, and (b) the contribution of capacitive and diffusion-controlled processes of ZnS/SnS<sub>2</sub>/SnO<sub>2</sub>@C.

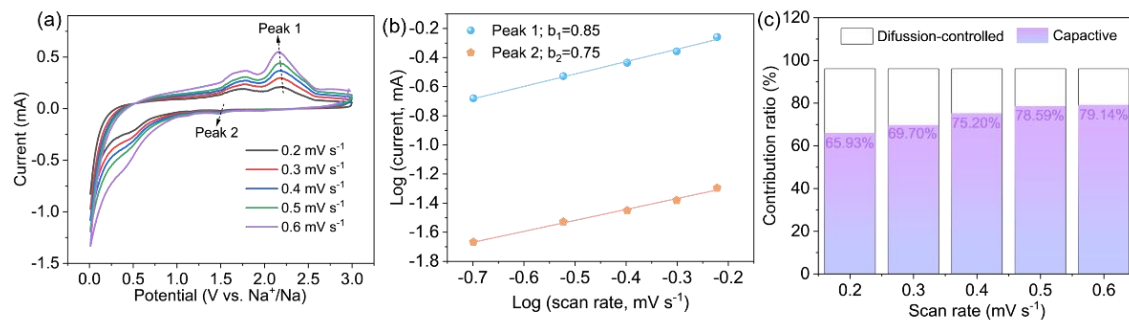

**Fig. S12** (a) CV curve of ZnS/SnS<sub>2</sub>/SnO<sub>2</sub> anode at scanning rates from 0.2 to 0.6 mV s<sup>-1</sup>. (b) The  $\log(i)$  vs.  $\log(v)$  of oxidization and reduction peaks. (c) Contribution ratio of capacitive and diffusion-control processes.

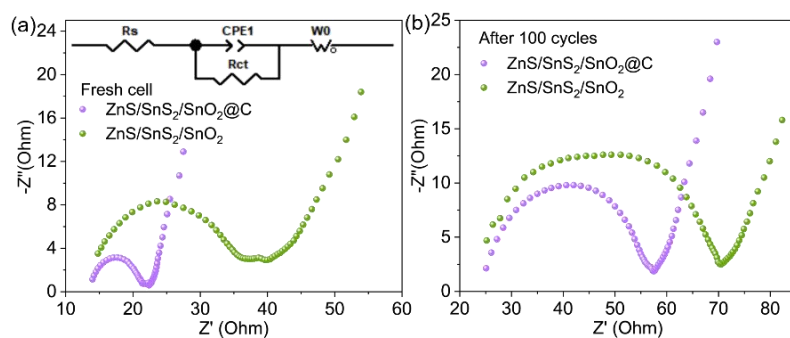

**Fig. 13** EIS spectra of ZnS/SnS<sub>2</sub>/SnO<sub>2</sub>@C and ZnS/SnS<sub>2</sub>/SnO<sub>2</sub> (a) before and (b) after 100 cycles at 1.0 A g<sup>-1</sup>.

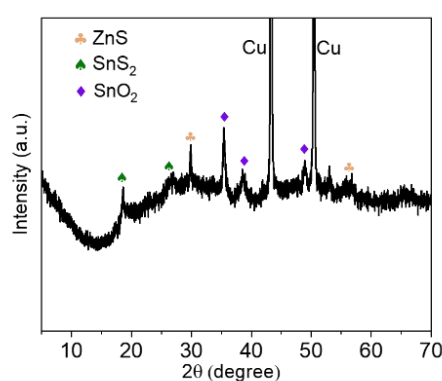

**Fig. S14** XRD pattern of ZnS/SnS<sub>2</sub>/SnO<sub>2</sub>@C after cycling 100 times at 1.0 A g<sup>-1</sup>.

**Table S1.** Bond distances and coordination numbers for ZnS/SnS<sub>2</sub>/SnO<sub>2</sub>@C. Information obtained from EXAFS K and R space transformations with fitting. The low R factors confirm the quality of the fitting.

| samples                                   | path | C.N. <sup>[a]</sup> /N | R (Å) <sup>[b]</sup> | $\sigma^2$ (x 10 <sup>-3</sup> Å <sup>2</sup> ) <sup>[c]</sup> | R-factor <sup>[d]</sup> |
|-------------------------------------------|------|------------------------|----------------------|----------------------------------------------------------------|-------------------------|
| ZnS/SnS <sub>2</sub> /SnO <sub>2</sub> @C | Zn-S | 1.0                    | 2.34                 | 3.70                                                           | 0.023                   |

[a] Coordination number.

[b] Bond distance.

[c] Debye–Waller factor.

[d] Sum of squares measure of the fractional misfit.

The accuracies of the above parameters were estimated as CN, ±20%; R, ±1%;  $\sigma^2$ , ±20%.

**Table S2.** Comparison on electrochemical performance of Na-ion battery anodes.

| Anode materials                                      | Mass loading (mg cm <sup>-2</sup> ) | Current density (A g <sup>-1</sup> ) | Capacity (mAh g <sup>-1</sup> ) | Cycle number | Ref.       |
|------------------------------------------------------|-------------------------------------|--------------------------------------|---------------------------------|--------------|------------|
| ZnS/SnS <sub>2</sub> /SnO <sub>2</sub> @C            | 1.2                                 | 0.1                                  | 612                             | 100          | This study |
|                                                      |                                     | 1.0                                  | 471                             | 400          |            |
| UltraPhene™/s-SnS <sub>2</sub>                       | 1.0-2.0                             | 0.1                                  | 308                             | 100          | [5]        |
| SnS-SnS <sub>2</sub> @CNTs                           | 1.0-1.5                             | 0.1                                  | 413                             | 50           | [6]        |
| Few-layered MoS <sub>2</sub> @SnO <sub>2</sub> @C    | 1.0-1.5                             | 0.1                                  | 415                             | 50           | [7]        |
| Sb/SnO <sub>2</sub> @C                               | 1.1                                 | 1.0                                  | 115                             | 2000         | [8]        |
| Porous carbon/C@SnO <sub>2</sub> @BaTiO <sub>3</sub> | 1.0-1.5                             | 0.1                                  | 372                             | 300          | [9]        |
| FeS/ZnS                                              | 1.5                                 | 0.1                                  | 475                             | 50           | [10]       |
| ZnS-Sb@C@rGO                                         | 1.2-1.5                             | 1.0                                  | 210                             | 300          | [11]       |
| NiS/ZnS@C                                            | 1.1                                 | 1.0                                  | 414                             | 180          | [12]       |

## References

- 1 T. Y. Hou, G. J. Tang, X. H. Sun, S. Cai, C. M. Zheng and W. B. Hu, RSC Adv., 2017, 7, 43636-43641.
- 2 W. Ji, L. Hu, X. Hu, Y. C. Ding and Z. H. Wen, Mater. Today Commun., 2019, 19, 396-401.
- 3 Y. R. Ren, J. W. Wang, X. B. Huang and J. N. Ding, Mater. Lett., 2017, 186, 57-61.
- 4 H. Y. Li, X. T. Jia, B. Huang, J. W. Yang, Y. W. Li and S. K. Zhong, Nanotechnology, 2023, 325602.

- 5 P. C. Tai, R. J. Chung, C. Kongvarhodom, S. Husain, S. Yougbaré, H. M. Chen, Y. F. Wu and L. Y. Lin, *J. Colloid Interface Sci.*, 2024, **679**, 691–702.
- 6 Q. Li, S. R. Wang, Y. Wang, H. Z. Ma, J. J. Du, X. H. He, N. Huang, C. L. Li, W. P. Wang and Y. Q. Weng, *Mater. Lett.*, 2024, **366**, 136476.
- 7 Z. L. Wu, Z. Q. Huang, M. X. Yu, Y. N. Du, J. W. Li, H. Jia, Z. Y. Lin, X. H. Huang and S. M. Ying, *Dalton Trans.*, 2024, **53**, 15920-15927.
- 8 J. A. Wu, C. L. Liu, H. B. Huang, M. L. Xie, D. Ma and X. Liang, *J. Electroanal. Chem.*, 2024, **978**, 118888.
- 9 M. C. Ye, J. M. Ye, Z. Y. Zhang, Z. Y. Feng, D. P. Xiong and M. He, *J. Power Sources*, 2025, **630**, 236160.
- 10 D. L. Xie, S. Cai, X. H. Sun, T. Y. Hou, K. E. Shen, R. Ling, A. R. Fan, R. Z. Zhang, S. Jiang and Y. S. Lin, *Inorg. Chem. Commun.*, 2019, **111**, 107635.
- 11 M. Zhu, Y. Jiang, X. J. Yang, X. S. Li, L. Y. Wang and W. Lü, *ACS Appl. Nano Mater.*, 2023, **6**, 13503-13512.
- 12 J. J. Wang, J. X. Fan, M. Y. Fan, X. Y. Yue, J. Zhang, Z. Liu, Z. K. Xie, Q. Zhao, A. Abudula and G. Q. Guan, *J. Power Sources*, 2024, **626**, 235803.
